# 1 Genetic risk and incident venous thromboembolism in middle-aged and older adults following 2 Covid-19 vaccination

3 Authors: Junqing Xie<sup>1</sup>, Albert Prats-Urbe<sup>1</sup>, Maria Gordillo Maranon<sup>2,3</sup>, Victoria Y. Strauss<sup>1</sup>, Dipender  
4 Gill<sup>4,5,6</sup>, Daniel Prieto-Alhambra<sup>1,7</sup>

- 5 1. Centre for Statistics in Medicine, NDORMS, University of Oxford
- 6 2. Data Analytics and Methods Task Force, European Medicines Agency, Amsterdam, Netherlands
- 7 3. Institute of Cardiovascular Science, University College London, London, UK
- 8 4. Clinical Pharmacology and Therapeutics Section, Institute for Infection and Immunity, St  
9 George's, University of London, London, UK
- 10 5. Department of Epidemiology and Biostatistics, Imperial College London, London, UK
- 11 6. Novo Nordisk Research Centre Oxford, Old Road Campus, Oxford, UK
- 12 7. Medical Informatics, Erasmus Medical Center University, Rotterdam

## 13 14 15 **BACKGROUND**

16 Covid-19 vaccination has been associated with an increased risk of venous thromboembolism (VTE).  
17 However, it is unknown whether genetic predisposition to VTE is associated with an increased risk of  
18 thrombosis following vaccination.

## 19 **METHODS**

20 Using data from the UK Biobank, which contains in-depth genotyping data and linked vaccination  
21 and health outcomes information, we generated a polygenic risk score (PRS) using 299 genetic  
22 variants identified from a previous large genome-wide association study. We prospectively assessed  
23 associations between PRS and incident VTE after first and the second-dose vaccination separately.  
24 We conducted sensitivity analyses stratified by vaccine type (adenovirus- and mRNA-based) and  
25 using two historical unvaccinated cohorts. We estimated hazard ratios (HR) for PRS-VTE associations  
26 using Cox models.

## 27 **RESULTS**

28 Of 359,310 individuals receiving one dose of a Covid-19 vaccine, 160,327 (44.6%) were males, and  
29 the mean age at the vaccination date was 69.05 (standard deviation [SD] 8.04) years. After 28- and  
30 90-days follow-up, 88 and 299 individuals developed VTE respectively, equivalent to an incidence  
31 rate of 0.88 (95% confidence interval [CI] 0.70 to 1.08) and 0.92 (95% CI 0.82 to 1.04) per 100,000  
32 person-days. The PRS was significantly associated with a higher risk of VTE (HR per 1 SD increase in  
33 PRS, 1.41 (95% CI 1.15 to 1.73) in 28 days and 1.36 (95% CI 1.22 to 1.52) in 90 days). Similar  
34 associations were found after stratification by vaccine type, in the two-dose cohort and across the  
35 historical unvaccinated cohorts.

## 36 **CONCLUSIONS**

37 The genetic determinants of post-Covid-19-vaccination VTE are similar to those seen in historical  
38 data. This suggests that, at the population level, post-vaccine VTE has similar aetiology to  
39 conventional VTE. Additionally, the observed PRS-VTE associations were equivalent for adenovirus-  
40 and mRNA-based vaccines.

41

**NOTE:** This preprint reports new research that has not been certified by peer review and should not be used to guide clinical practice.

## 42 **Introduction**

43 Venous thromboembolism (VTE), primarily comprising deep vein thrombosis and pulmonary  
44 embolism, is predominantly a disease of older age that affects nearly 10 million people worldwide  
45 every year and frequently leads to morbidities and death.<sup>1-3</sup> Severe acute respiratory syndrome  
46 coronavirus-2 (SARS-CoV-2) infection and coronavirus disease 2019 (Covid-19) have been recognised  
47 as novel environmental triggers for VTE. Also, a number of spontaneous thromboembolic  
48 complications were reported after Covid-19 vaccination, prompting the withdrawal of the Oxford-  
49 AstraZeneca vaccine (ChAdOx1) from several markets or restrictions on its use. Later, emerging  
50 evidence has suggested that VTE risks are substantially higher after SARS-CoV-2 infection than after  
51 vaccination, regardless of vaccine type or brand.<sup>4</sup>

52 Twins and family studies have shown that VTE is highly heritable, and a few clinical studies suggest  
53 that inherited thrombophilia can interact with various environmental risk factors, such as infectious  
54 pneumonia.<sup>5,6</sup> Additionally, many genetic variants associated with VTE and their effect sizes have  
55 been identified in large-scale genome-wide association studies (GWASs), making it possible to  
56 construct a polygenic risk score (PRS) to quantify genetic predisposition to the VTE trait.

57 The present study aimed to assess the association between a previously validated PRS for  
58 conventional VTE and the post-Covid-19-vaccination VTE, where thrombotic events following post-  
59 Covid-19-vaccination were hypothesised to be involved in distinctive pathobiological mechanisms.

60

## 61 **Methods**

### 62 *UK Biobank*

63 The UK Biobank (UKBB) is a prospective cohort of over 500,000 individuals recruited from England  
64 (89%), Wales (7%) and Scotland (4%) between 2006 and 2010. Age at baseline enrolment ranged  
65 from 40 to 69 years. Comprehensive information on demographics, socioeconomic, lifestyle factors,  
66 physical metrics, and medical history were collected using a computer-based questionnaire and a  
67 standardised portfolio of measurements.<sup>7</sup> Genome-wide genotyping was performed using two  
68 closely related purpose-designed arrays (the UK BiLEVE Axiom array and UK Biobank Axiom array).  
69 The genetic data have been quality controlled as described in previous studies.<sup>8</sup> Over the follow-up,  
70 health-related outcomes were captured through linkage to external data sources, including primary  
71 care, hospital inpatient and death data. Additional information is available at  
72 <https://www.ukbiobank.ac.uk/>.

73 UKBB received ethical approval from the research ethics committee (National Health Service's  
74 National Research Ethics Service North West (11/NW/0382), with all participants providing written  
75 consent. This study was conducted under Application Number 65397.

### 76 *Study population and design*

77 For the vaccinated cohorts, all UKBB participants from England who received at least one dose of  
78 BNT162b2 or ChAdOx1Covid-19 vaccines between December 2, 2020 (i.e., vaccines approval date in  
79 the UK) and September 31, 2021 were included. Eligible participants were followed from the  
80 vaccination date (index date) to outcome, death or the end of pre-specified follow-up windows (28  
81 and 90 days), whichever came first. The participants from Wales or Scotland were not included due  
82 to the lack of linkage to their vaccination records at the time of this analysis performed.

83 Two historical unvaccinated cohorts (named early-pandemic and pre-pandemic cohorts) were  
84 constructed for comparison. For the early-pandemic cohort, the observational period started from  
85 March 23 2020 (the announcement of the first national lockdown in the UK, index date) to  
86 December 1 2020 (the last day before Covid-19 vaccines approval). In contrast, the pre-pandemic  
87 cohort was followed one year earlier, from March 23 2019 (index date) to March 23 2020. In  
88 addition, a Covid-19 infection cohort was curated with the date of infection as index date. People  
89 with historical VTE at the study entry date were excluded for all study cohorts.

### 90 *Polygenic risk score*

91 We derived polygenic risk scores (PRS) for VTE as a weighted sum of risk alleles, using summary  
92 statistics of 299 single nucleotide polymorphisms (SNPs) from a genome-wide association study  
93 (GWAS) on VTE, which included the two clinically validated mutations: factor V Leiden p.R506Q and  
94 prothrombin G20210A.<sup>9</sup> Given that the selected GWAS sample included UKBB participants, we  
95 conducted a sensitivity analysis using a newly generated alternative PRS based on a meta-analysis of  
96 12 GWASs that did not cover UKBB participants.<sup>10</sup> We standardised the continuous PRS by z-  
97 transformation to achieve a zero mean and standard deviation of 1 based on the entire UKBB  
98 population.

99 Details on data manipulation and completed lists of SNPs included in the primary PRS and alternative  
100 PRS are provided in the **sTable 1** and **sTable 2**.

### 101 *Vaccination against covid-19*

102 Vaccination status for UKBB participants was obtained from the linked primary care records  
103 provided by the two GP system suppliers: EMS and TPP (latest update: September 31, 2021). The  
104 clinical codes used for the first and second dose of the Covid-19 vaccines were "1324681000000101"  
105 and "1324691000000104" in EMS (SNOMED CT) and "Y29e7" and "Y29e8" in TPP (READ v3),  
106 respectively.

### 107 *Venous thromboembolism*

108 VTE, including pulmonary embolism and deep vein thrombosis, was captured from linked hospital  
109 admission data from Hospital Episode Statistics, which contains all admissions in NHS hospitals in  
110 England. Mortality was ascertained from linked national death registry data. We used the earliest  
111 date of VTE diagnosis as the event date. ICD-10 codes used to identify VTE and death are given in the  
112 **sTable 3**.

### 113 *Statistical analyses*

114 We used Cox proportional-hazards models to assess the associations between the PRS and VTE  
115 outcome. We computed hazard ratios (HR) and their 95% confidence intervals (CI) with adjustment  
116 for age (at the index date), sex, and genetic ancestry (quantified by the first ten principal  
117 components). To identify the high genetic risk group, we tested three cut-off quantiles of PRS  
118 separately, including upper tertile (top 33%), quintile (top 20%), and the top 5% with the lower 66%  
119 as the reference. To ensure sufficient statistical power, this analysis was only performed in the 90-  
120 days follow-up window. We evaluated the balance of baseline characteristics within each  
121 comparison pair according to a list of pre-specified covariates and adjusted for them in the Cox  
122 model if their absolute standardised mean difference was greater than 0.1. Considering varying VTE  
123 rates across the reference groups, we derived absolute risk increases (ARI) between high-risk and  
124 the reference PRS categories using the formula: (adjusted HR – 1) \* cumulative incidence in the  
125 reference group.

126 We calculated HRs for diabetes as a negative control outcome to examine the specificity of the PRS  
127 and the likelihood of potential residual confounding. Diabetes was chosen with considerations that it  
128 is a well-developed disease phenotype and not biologically related to the VTE PRS. In a sub-cohort  
129 where the EMIS system provided the primary care data, and vaccine types were recorded, separate  
130 HRs were estimated among either ChAdOx1 or BNT162b2 vaccine recipients. Given that the  
131 heterologous prime-boost vaccination schedule in the UK is very uncommon<sup>11</sup> ( with <1% in our  
132 data), no specific analyses in this regard have been performed.

133 All the analyses were performed using PLINK1.9, QCTOOL v2, and R 4.1.2 software.

134

## 135 **Results**

### 136 *Characteristics of vaccine recipients in UKBB*

137 Of 380,822 UKBB participants eligible at the study entry (December 2, 2020), 378,662 (99.4%) and  
138 376,416 (98.8%) received the first and second dose of Covid-19 vaccines, respectively, until the study  
139 end date (September 31, 2021) (**Figure 1**). For the one-dose cohort, the mean age was 69.05 years  
140 (standard deviation 8.04), and 160,327 (44.6%) were male (**Table 1**). A similar demographic profile  
141 was observed for the two-dose cohort (**Table 1**). The PRS approximated a normal distribution within  
142 each cohort (**sFigure 1**).

### 143 *Association of the PRS with incident VTE*

144 During the follow-up periods, 88 and 299 individuals developed VTE within 28 and 90 days after first-  
145 dose vaccination (**Table 2**), equivalent to an incidence rate of 0.88 (95% CI 0.70 to 1.08) and 0.92  
146 (95% CI 0.82 to 1.04) per 100,000 person-days. The unadjusted and adjusted HRs for VTE associated  
147 with the primary PRS were similar, with the latter being 1.41 (95% 1.15 to 1.73) per 1-SD increase in  
148 PRS (1-SD-PRS) over 28-day follow-up and 1.36 (95% 1.22 to 1.52) over 90-days. The association  
149 between the PRS value and risk of VTE appears to be monotonic in nature (**sFigure 2**). After the  
150 second dose vaccination, the association between PRS and VTE was slightly attenuated (HR: 1.30  
151 (95% 1.04 to 1.61) per 1-SD-PRS and 1.33 (95% 1.18 to 1.49) in the 28- and 90-days' follow-up  
152 window, respectively) (**Table 2**). Although there was a seemingly inverted U-shaped relationship  
153 between the PRS and estimate of VTE risk following the second dose of vaccine, wide confidence  
154 intervals limit the reliability of this finding.

155 The observed rates and effect sizes of the observed associations were similar when comparing the  
156 vaccinated and historical (unvaccinated) cohorts. Also, although absolute incidence rates of VTE in  
157 the infected cohort were substantially higher than those in other cohorts, the PRS-VTE association  
158 persisted. A sensitivity analysis using an alternative PRS found similar although slightly weaker  
159 associations (**Table 2**).

160 Finally, no associations were observed for our proposed negative control outcome: the HR between  
161 PRS and incident diabetes was 1.02 (95% 0.98 to 1.06) in the pre-pandemic and 0.98 (95% 0.93 to  
162 1.04) in the early pandemic period (**sTable 4**).

### 163 *Identification of high-risk group*

164 **Figure 2** presents HRs and ARI for VTE across three pre-defined high-risk categories. Briefly, relative  
165 risks increased with cut-offs from 33% to 5%, corresponding to HRs ranging from 1.67 (95% 1.33 to  
166 2.09) to 2.10 (95% 1.39 to 3.18) in the one- and from 1.66 (95% 1.30 to 2.11) to 1.97 (95% 1.26 to  
167 3.09) in the two-dose cohorts. Also, there was a linear increasing trend for absolute risk differences,

168 with ARI of 0.45 (95% 0.22 to 0.74) to 0.76 (95% .27 to 1.51) and 0.40 (95% 0.19 to 0.67) to 0.59  
169 (95% 0.16 to 1.28) in the one- and two-dose cohort respectively.

### 170 *Different vaccine types*

171 Among 221,875 recipients with vaccine-type information available (138,059 received ChAdOx1 and  
172 83,816 received BNT162b2), the observed PRS-VTE associations were similar across each dose and  
173 follow-up window: HR ranged from 1.24 (95% CI 0.88 to 1.77) to 1.63 (95% CI 1.34 to 1.98) in  
174 ChAdOx1 vaccinated cohorts, and from 1.20 (95% CI 0.82 to 1.76) to 1.38 (95% CI 0.99 to 1.93) in  
175 BNT162b2 vaccinated people (**Table 3**). Noticeably, the background VTE incidence rates in BNT162b2  
176 vaccinated cohorts were almost doubly higher than those in the ChAdOx1 vaccinated one, which was  
177 expected given that the former vaccine was approved earlier in the UK and prioritised for older and  
178 more vulnerable populations.<sup>12</sup>

179

## 180 **Discussion**

181 Our study showed that a PRS for VTE could identify people at increased risk of VTE within 28 or 90  
182 days after receiving one or two doses of Covid-19 vaccines. Furthermore, the strength of the PRS  
183 association to post-Covid-19-vaccination VTE was similar to that seen for VTE before Covid-19  
184 vaccination rollout.

185 The PRS used in the present study was developed and validated by Klarin .et al. Such study found a  
186 2.5 to 3-fold increased risk of VTE associated with the highest 5% of the score in both case-control  
187 and prospective cohort study settings.<sup>9</sup> Recently, Marston et al. tested the performance of the PRS  
188 among cardiometabolic disease patients to predict VTE and observed a similar magnitude of effect  
189 (2.7-fold for top 33 % vs bottom 66%).<sup>13</sup> Despite being aligned with these findings, the PRS-VTE  
190 associations estimated in our study were consistently weaker than the previously reported ones  
191 even after the incorporation of the two clinically validated variants, possibly due to the discrepancies  
192 in defining VTE phenotypes between the original score deviation and this validation study. Also,  
193 because our cohort only consisted of VTE naïve and relatively older participants, those with higher  
194 genetic risk might have had a VTE in their earlier age and thus been excluded. As expected, our PRS  
195 was not associated with the proposed negative control outcome (incident diabetes), to some extent,  
196 demonstrating its specificity for VTE prediction.

197 The results of this study support several noteworthy conclusions. First, our data showed that  
198 individuals' genetic susceptibility to VTE was a risk factor for VTE among the Covid-19 vaccinated  
199 population. Second, this genetic risk was independent of traditional risk factors such as old age,  
200 obesity and comorbidity, as indicated by no associations between the PRS and baseline  
201 characteristics (**Table 1**). Third, by designing a historical comparison arm in the same population, our  
202 data suggest that clinically significant interactions between individuals' genetic background and  
203 Covid-19 vaccination are unlikely, which has particular implications for patients with hereditary VTE  
204 predisposing traits who are hesitant to be vaccinated because of concerns regarding related recent  
205 vaccine safety signals. Fourth, we identified 5% of people with more than 2-fold higher VTE risk by  
206 using this genetic score, it should be of public health relevance and can inform potential intervention  
207 policies given the absolute size of Covid-19 vaccinated population. Our analyses have some potential  
208 limitations. First, VTE often presents variable clinical manifestations with challenging differential  
209 diagnoses such as myocardial infarction and congestive heart failure.<sup>2</sup> Consequently, identification of  
210 VTE in a real-world setting is likely subject to information bias, which typically drives risk estimates  
211 towards the null. Second, we were not able to generate a parallel unvaccinated comparison group

212 because more than 99% of UKBB participants had been vaccinated. However, we constructed a  
213 historical comparison cohort with similar characteristics to those vaccinated. Also, given the  
214 relatively short follow-up after vaccination, the long-term impact of the genetic factor remains to be  
215 determined. Third, although we also constructed a secondary PRS for VTE, the weights of each  
216 included SNP have not been previously validated, and their utility in a PRS remains unknown.  
217 Opportunely, it conferred consistent results as the primary PRS did, likely due to the fact that both  
218 PRSs included the factor V Leiden p.R506Q and prothrombin G20210A variants which are known  
219 causes of inherited thrombophilia predisposing to acute thrombotic syndromes<sup>14,15</sup>. Fourth, the HR  
220 estimates for each vaccine type should be considered exploratory in nature due to evident  
221 differences in the baseline risk for VTE seen between people vaccinated with the two vaccines. Last,  
222 the generalizability of our findings should be tested in more diverse ethnic populations as more  
223 integrated data sources containing in-depth genetic, vaccination, and health information becomes  
224 available.

225 This study benefits from the use of a large prospective cohort with comprehensive genetic, Covid-19  
226 vaccination, Covid-19 infection status and VTE phenotype data linked at the individual level, the  
227 application of the state-of-the-art PRS, and robust analytic methods by designing multiple  
228 comparison groups and a negative control outcome. To our knowledge, this is the first study to show  
229 that individuals' who developed post-Covid19-vaccination VTE had a genetic predisposition to VTE,  
230 and that the association between the genetic risk factors and post-Covid19-vaccination VTE is similar  
231 to the association with conventional VTE.

## 232 **Conclusions**

233 A published PRS for VTE, constructed using common genetic variants with small effects on VTE, was  
234 associated with increased VTE risk following Covid-19 vaccination. This association was similar to  
235 that seen historically, both in pre-pandemic times and during the first year of the Covid-19  
236 pandemic, before vaccines were available. Our data do not support a clinically meaningful interplay  
237 between genetic predisposition and Covid-19 vaccines on the occurrence of VTE events. These  
238 findings suggest that the clinical management of VTE among the vaccinated population should not  
239 be disturbed by the concern of gene-vaccine interaction, and that people at high genetic risk of VTE  
240 such as those with inherited thrombophilia might have a modest excess risk of VTE occurrence  
241 following vaccination.

242

243

244 **Disclaimer**

245 The views expressed in this article are the personal views of the author(s) and may not be  
246 understood or quoted as being made on behalf of or reflecting the position of the regulatory  
247 agency/agencies or organisations with which the author(s) is/are employed/affiliated.

248 **Funding**

249 Mr Xie is funded through Jardine-Oxford Graduate Scholarship and a titular Clarendon Fund  
250 Scholarship. DG is supported by the British Heart Foundation Research Centre of Excellence  
251 (RE/18/4/34215) at Imperial College London and by a National Institute for Health Research Clinical  
252 Lectureship (CL-2020-16-001) at St. George's, University of London. Prof Prieto-Alhambra is funded  
253 through an NIHR Senior Research Fellowship (grant SRF-2018-11-ST2-004), and received partial  
254 support from the Oxford NIHR Biomedical Research Centre. APU has received funding from the  
255 Medical Research Council (MRC) [MR/K501256/1, MR/N013468/1].

256 **Conflicts of interest**

257 Prof Prieto-Alhambra research group has received grants and advisory or speaker fees from Amgen,  
258 Astellas, AstraZeneca, Chiesi-Taylor, Johnson & Johnson, and UCB; and that Janssen, on behalf of  
259 Innovative Medicines Initiative–funded European Health Data Evidence Network and European  
260 Medical Information Framework consortiums and Synapse Management Partners, have supported  
261 training programs, open to external participants, organized by his department. DG is employed part-  
262 time by Novo Nordisk.

263 **Ethical approval**

264 All participants provided written informed consent at the UKBB cohort recruitment. This study  
265 received ethical approval from UKBB Ethics Advisory Committee (EAC) and was performed under the  
266 application of 65397.

267 **Data sharing**

268 Bonafide researchers can apply to use the UK Biobank dataset by registering and applying at  
269 <http://ukbiobank.ac.uk/register-apply/>. The datasets generated and/or analysed during the current  
270 study are available from the corresponding author on reasonable request.

271 **Transparency declaration**

272 The lead author affirms that this manuscript is an honest, accurate, and transparent account of the  
273 study being reported; that no important aspects of the study have been omitted.

274 **Contributors**

275 D.P.A., J.Q.X., D.G were responsible for the study design. J.Q.X. did the data analyses, and A.P.U.  
276 checked the statistical codes. J.Q.X. and D.P.A. drafted the manuscript, and all co-authors reviewed  
277 and approved it for submission.

278

279

**Figure 1: Flow chart of the study selection process**

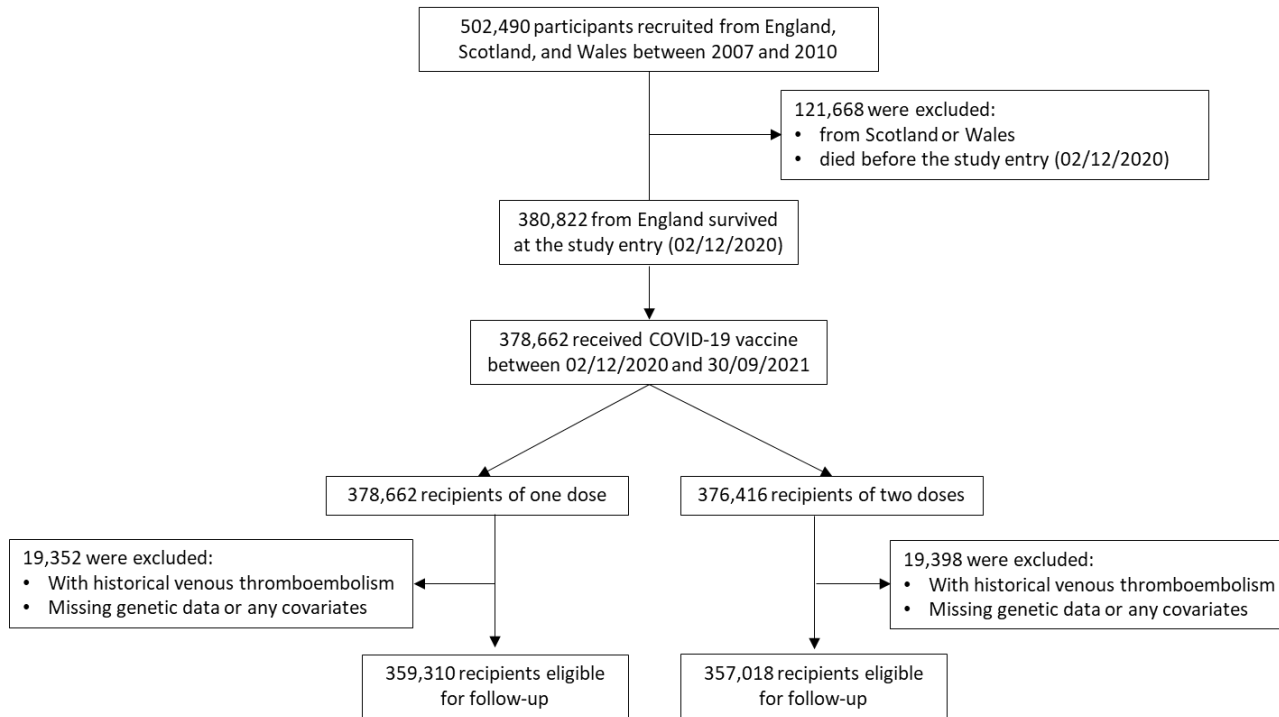



**Table 1: Baseline characteristics by the genetic risk categories (one dose).**

|                                         |               | High PRS groups |               |               |
|-----------------------------------------|---------------|-----------------|---------------|---------------|
|                                         | Overall       | Top 33%         | Top 20%       | Top 5%        |
| <b>Number</b>                           | 359,310       | 119,770         | 71,862        | 17,965        |
| <b>Demographics</b>                     |               |                 |               |               |
| Age, mean (sd)                          | 69.05 (8.04)  | 69.10 (8.01)    | 69.14 (8.02)  | 69.11 (8.02)  |
| Sex, male (%)                           | 160327 (44.6) | 53178 (44.4)    | 31766 (44.2)  | 7909 (44.0)   |
| BMI, mean (sd)                          | 27.30 (4.69)  | 27.29 (4.69)    | 27.29 (4.69)  | 27.26 (4.69)  |
| <b>Socio-economic status, mean (sd)</b> |               |                 |               |               |
| IMD (Indices of Multiple Deprivation)   | 17.18 (13.62) | 17.00 (13.50)   | 16.91 (13.43) | 16.71 (13.27) |
| Income score                            | 0.11 (0.09)   | 0.11 (0.09)     | 0.11 (0.09)   | 0.11 (0.09)   |
| Employment score                        | 0.09 (0.06)   | 0.09 (0.06)     | 0.09 (0.06)   | 0.08 (0.06)   |
| Health score                            | -0.11 (0.84)  | -0.12 (0.84)    | -0.13 (0.84)  | -0.14 (0.84)  |
| Education score                         | 15.23 (15.84) | 15.14 (15.75)   | 15.09 (15.74) | 14.98 (15.70) |
| Housing score                           | 19.76 (10.12) | 19.64 (10.08)   | 19.58 (10.07) | 19.47 (10.10) |
| Crime score                             | -0.06 (0.77)  | -0.06 (0.77)    | -0.07 (0.77)  | -0.07 (0.78)  |
| Living environmental score              | 18.28 (15.07) | 18.15 (14.96)   | 18.08 (14.89) | 17.93 (14.66) |

Indices of Multiple Deprivation offer a more complex and detailed view of deprivation, based on more factors than the Townsend index. All scores has been scaled to 0 to 1, 0 to 100, or even distributions standardized around 0, with higher values indicating more deprived. Details of individual score has been described in the GOV.UK (<https://www.gov.uk/government/collections/english-indices-of-deprivation>).

**Table 2: Association between the genetic score and incident venous thromboembolism in vaccinated and reference cohorts.**

|                                          | Number of people | Number of cases | Incidence rate (95% CI)* | Primary PRS                                    |                                             | Secondary PRS                               |
|------------------------------------------|------------------|-----------------|--------------------------|------------------------------------------------|---------------------------------------------|---------------------------------------------|
|                                          |                  |                 |                          | Un-adjusted hazard ratio (95% CI) <sup>§</sup> | Adjusted hazard ratio (95% CI) <sup>§</sup> | Adjusted hazard ratio (95% CI) <sup>§</sup> |
| <b>Vaccinated cohorts</b>                |                  |                 |                          |                                                |                                             |                                             |
| 28 days after one dose                   | 359,310          | 88              | 0.88 (0.70 to 1.08)      | 1.41 (1.15 to 1.73)                            | 1.41 (1.15 to 1.73)                         | 1.38 (1.13 to 1.70)                         |
| 90 days after one dose                   | 359,310          | 299             | 0.92 (0.82 to 1.04)      | 1.36 (1.22 to 1.52)                            | 1.36 (1.22 to 1.52)                         | 1.34 (1.20 to 1.50)                         |
| 28 days after two doses                  | 357,018          | 78              | 0.78 (0.62 to 0.97)      | 1.31 (1.05 to 1.63)                            | 1.30 (1.04 to 1.61)                         | 1.25 (1.00 to 1.55)                         |
| 90 days after two doses                  | 357,018          | 269             | 0.83 (0.74 to 0.96)      | 1.34 (1.19 to 1.50)                            | 1.33 (1.18 to 1.49)                         | 1.29 (1.15 to 1.46)                         |
| <b>Historically unvaccinated cohorts</b> |                  |                 |                          |                                                |                                             |                                             |
| Whole UKBB (Pre-pandemic)                | 391,752          | 1078            | 0.76 (0.71 to 0.80)      | 1.36 (1.29 to 1.45)                            | 1.36 (1.28 to 1.44)                         | 1.34 (1.26 to 1.42)                         |
| Whole UKBB (Early-pandemic)              | 387,829          | 846             | 0.80 (0.74 to 0.85)      | 1.35 (1.26 to 1.44)                            | 1.34 (1.26 to 1.44)                         | 1.27 (1.19 to 1.36)                         |
| <b>Infected cohorts</b>                  |                  |                 |                          |                                                |                                             |                                             |
| 28 days after infection                  | 24,700           | 155             | 25.6 (21.8 to 30.0)      | 1.29 (1.10 to 1.51)                            | 1.32 (1.13 to 1.55)                         | 1.32 (1.12 to 1.55)                         |
| 90 days after infection                  | 24,700           | 186             | 10.9 (9.4 to 12.6)       | 1.27 (1.10 to 1.46)                            | 1.29 (1.12 to 1.49)                         | 1.28 (1.11 to 1.48)                         |

The pre-pandemic was defined as the period between March 23 2019, and March 23 2020. The early-pandemic was defined as the period between March 23 2020, and December 1 2020. The negative control outcome was incident diabetes.

PRS, polygenic risk score, \* per 100,000 person-days, <sup>§</sup>Per 1-SD increase of PRS.

Figure 2: 90-day cumulative incidence (A), hazard ratios (B) and absolute risk increases (C) of three pre-defined high genetic risk groups vs the reference.

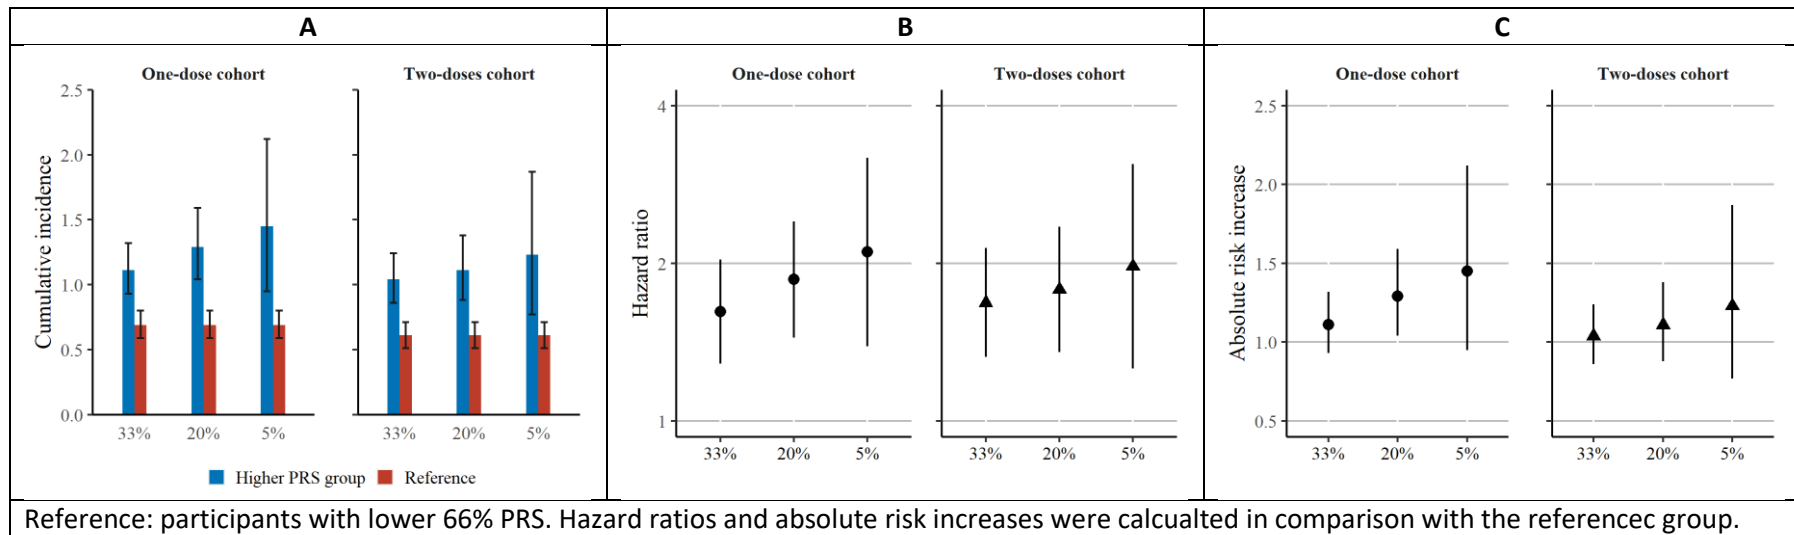

**Table 3: Exploratory analyses for different vaccine types.**

| Cohorts                 | ChAdOx1                 |                             |                                                | BNT162b2                |                             |                                                |
|-------------------------|-------------------------|-----------------------------|------------------------------------------------|-------------------------|-----------------------------|------------------------------------------------|
|                         | No. of cases/<br>people | Incidence rate<br>(95% CI)* | Adjusted hazard ratio<br>(95% CI) <sup>§</sup> | No. of cases/<br>people | Incidence rate<br>(95% CI)* | Adjusted hazard ratio<br>(95% CI) <sup>§</sup> |
| 28 days after one dose  | 25 / 138059             | 0.65 (0.42 to 0.96)         | 1.45 (0.99 to 2.13)                            | 33 / 83816              | 1.41 (0.97 to 1.98)         | 1.38 (0.99 to 1.93)                            |
| 90 days after one dose  | 94 / 138059             | 0.76 (0.61 to 0.93)         | 1.63 (1.34 to 1.98)                            | 99 / 83816              | 1.31 (1.07 to 1.60)         | 1.24 (1.02 to 1.50)                            |
| 28 days after two doses | 30 / 136002             | 0.79 (0.53 to 1.13)         | 1.24 (0.88 to 1.77)                            | 26 / 80709              | 1.15 (0.75 to 1.69)         | 1.20 (0.82 to 1.76)                            |
| 90 days after two doses | 100 / 136002            | 0.82 (0.67 to 1.00)         | 1.53 (1.27 to 1.85)                            | 87 / 80709              | 1.20 (0.96 to 1.48)         | 1.22 (1.00 to 1.51)                            |

\* per 100,000 person-days, <sup>§</sup>Per 1-SD increase of PRS.

**Supplementary materials:**

**sFigure 1: Distribution of polygenic risk score for venous thromboembolism**

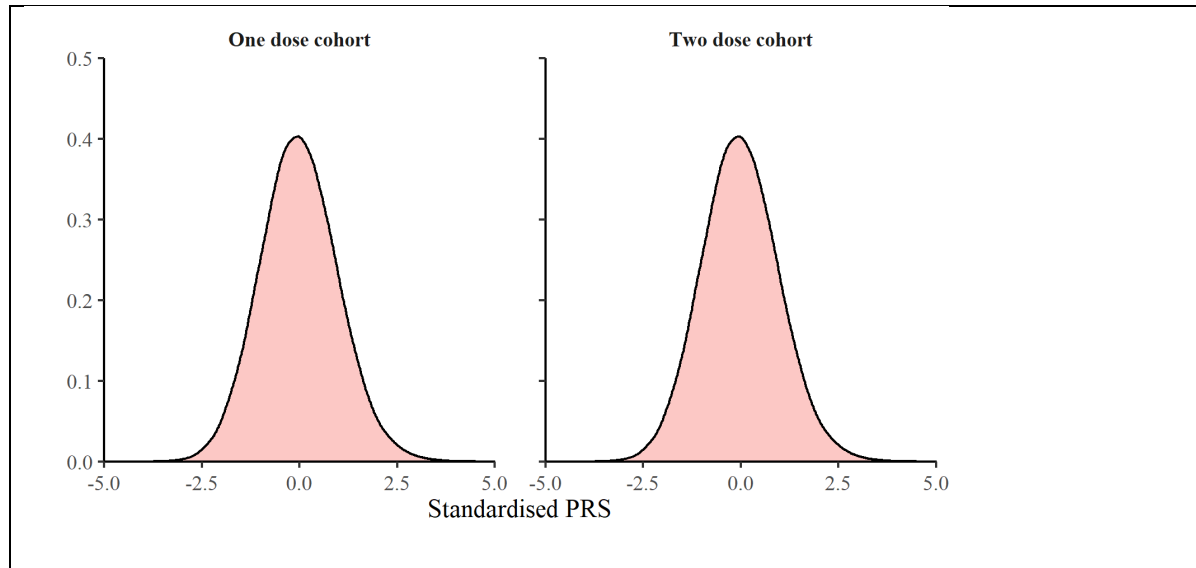

Figure 2: The relationship between the PRS value and the risk (hazard ratio) of VTE.

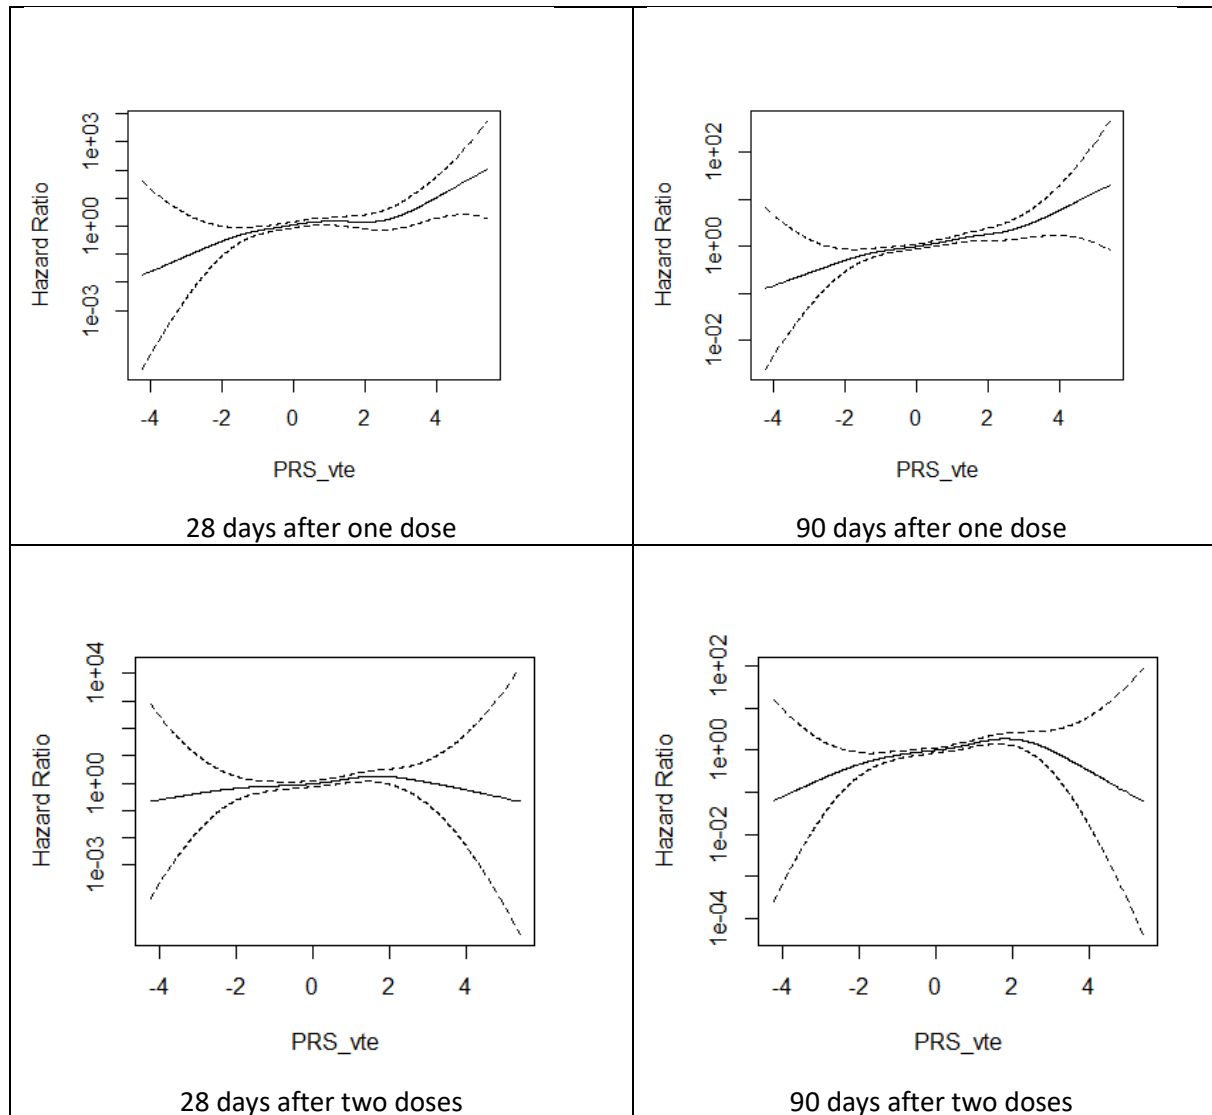

**sTable 1: Summary statistics for candidate SNPs used for constructing the main polygenic risk score (Main PRS\_VTE).**

| <b>Chr:Pos (GRCh37)</b> | <b>Rsid</b> | <b>Effect Allele</b> | <b>Beta</b> |
|-------------------------|-------------|----------------------|-------------|
| 1:11910677              | rs632793    | G                    | 0.0466      |
| 1:150388318             | rs698915    | A                    | 0.0561      |
| 1:166533517             | rs764024    | T                    | 0.0502      |
| 1:168406710             | rs111414961 | A                    | 0.1183      |
| 1:168500034             | rs72703796  | G                    | 0.2014      |
| 1:168572720             | rs72705895  | T                    | 0.1313      |
| 1:168577239             | rs12567872  | T                    | 0.0893      |
| 1:168619548             | rs1933116   | T                    | 0.1724      |
| 1:168673803             | rs611769    | C                    | 0.0562      |
| 1:168714137             | rs10918970  | T                    | 0.0572      |
| 1:168729611             | rs12117978  | A                    | 0.2166      |
| 1:168812398             | rs34258243  | G                    | 0.1015      |
| 1:168889373             | rs78516619  | G                    | 0.6841      |
| 1:168909952             | rs7526462   | T                    | 0.0714      |
| 1:168937072             | rs113123846 | G                    | 0.4417      |
| 1:168960286             | rs1322487   | A                    | 0.046       |
| 1:168969254             | rs35990973  | A                    | 0.1057      |
| 1:169012124             | rs1320969   | G                    | 0.0478      |
| 1:169014610             | rs116140155 | A                    | 0.2498      |
| 1:169031755             | rs113079063 | T                    | 0.2356      |
| 1:169038856             | rs12747018  | T                    | 0.0717      |
| 1:169064630             | rs1200118   | G                    | 0.1111      |
| 1:169070213             | rs1892091   | C                    | 0.0526      |
| 1:169079419             | rs1358714   | A                    | 0.0444      |
| 1:169086013             | rs2143289   | T                    | 0.2335      |
| 1:169107377             | rs7520186   | T                    | 0.0873      |
| 1:169276816             | rs10732287  | T                    | 0.0916      |
| 1:169316610             | rs10158131  | G                    | 0.0673      |
| 1:169318242             | rs72702145  | A                    | 0.1342      |
| 1:169463296             | rs147474835 | G                    | 0.12        |
| 1:169463519             | rs4656683   | T                    | 0.1781      |
| 1:169486141             | rs966751    | G                    | 0.1142      |
| 1:169511555             | rs6032      | T                    | 0.1351      |
| 1:169593113             | rs3917862   | G                    | 0.2198      |
| 1:169620673             | rs12075684  | G                    | 0.0534      |
| 1:169659128             | rs185120584 | T                    | 0.5696      |
| 1:170051841             | rs115476742 | C                    | 0.0857      |
| 1:170080014             | rs12128208  | C                    | 0.1373      |
| 1:170174298             | rs12144655  | A                    | 0.0893      |
| 1:181031783             | rs3936939   | A                    | 0.0458      |

| Chr:Pos (GRCh37) | Rsid        | Effect Allele | Beta   |
|------------------|-------------|---------------|--------|
| 1:201882277      | rs2644120   | C             | 0.058  |
| 1:207282149      | rs2842700   | A             | 0.1138 |
| 1:207285043      | rs577695638 | C             | 0.1708 |
| 1:230417394      | rs3088075   | T             | 0.0798 |
| 1:248028780      | rs79322592  | A             | 0.0517 |
| 1:248039451      | rs3811444   | C             | 0.0513 |
| 1:9341786        | rs677665    | T             | 0.0521 |
| 2:127934102      | rs10198483  | A             | 0.0559 |
| 2:127979335      | rs111736896 | A             | 0.0717 |
| 2:128133076      | rs35293119  | G             | 0.0442 |
| 2:128175875      | rs1799809   | G             | 0.072  |
| 2:128187428      | rs67495946  | C             | 0.0631 |
| 2:128398892      | rs67076363  | A             | 0.0733 |
| 2:161845453      | rs75145714  | C             | 0.1264 |
| 2:178238316      | rs4893934   | G             | 0.0449 |
| 2:198894550      | rs535527575 | G             | 0.1319 |
| 2:198946551      | rs6434955   | G             | 0.0587 |
| 2:68530180       | rs13013670  | T             | 0.0485 |
| 2:68619981       | rs1867312   | C             | 0.0585 |
| 3:126238371      | rs11721316  | A             | 0.061  |
| 3:126276710      | rs12636448  | C             | 0.0456 |
| 3:150872174      | rs75347181  | A             | 0.1323 |
| 3:150880908      | rs3116549   | C             | 0.0522 |
| 3:185234111      | rs115110838 | T             | 0.0649 |
| 3:194787481      | rs116764841 | T             | 0.0661 |
| 3:36140951       | rs113114306 | T             | 0.1047 |
| 3:39240559       | rs7622284   | T             | 0.0741 |
| 3:6084766        | rs11712865  | G             | 0.0799 |
| 3:77048575       | rs6799348   | G             | 0.1488 |
| 3:88354842       | rs1841009   | T             | 0.0567 |
| 3:89250573       | rs7374904   | A             | 0.0751 |
| 3:89679389       | rs141912156 | T             | 0.1656 |
| 3:90390344       | rs9858006   | A             | 0.0465 |
| 3:93518545       | rs139156297 | T             | 0.1588 |
| 3:93580976       | rs9290378   | T             | 0.0509 |
| 3:94209055       | rs9290227   | T             | 0.0849 |
| 4:155251071      | rs116333064 | A             | 0.1157 |
| 4:155424231      | rs4323084   | T             | 0.1012 |
| 4:155432944      | rs4547780   | G             | 0.064  |
| 4:155450158      | rs13435192  | T             | 0.1124 |
| 4:155474683      | rs115999709 | G             | 0.1456 |
| 4:155494926      | rs79726896  | G             | 0.1598 |



| Chr:Pos (GRCh37) | Rsid        | Effect Allele | Beta   |
|------------------|-------------|---------------|--------|
| 4:155513276      | rs2070008   | T             | 0.0975 |
| 4:155515486      | rs1984906   | G             | 0.0671 |
| 4:155538470      | rs13130318  | G             | 0.1984 |
| 4:155542926      | rs59234924  | G             | 0.1077 |
| 4:155544958      | rs72681247  | T             | 0.2163 |
| 4:155553541      | rs79201245  | C             | 0.1462 |
| 4:187114479      | rs10866290  | C             | 0.0464 |
| 4:187130620      | rs72646294  | A             | 0.1947 |
| 4:187136519      | rs113435394 | C             | 0.2091 |
| 4:187161283      | rs551251712 | C             | 0.2385 |
| 4:187169469      | rs2203111   | G             | 0.0901 |
| 4:187178014      | rs3775303   | T             | 0.1486 |
| 4:187180115      | rs4253333   | G             | 0.0494 |
| 4:187190285      | rs925452    | A             | 0.2681 |
| 4:187196853      | rs4253414   | C             | 0.1544 |
| 4:187200550      | rs56810541  | T             | 0.1975 |
| 4:187205929      | rs4253425   | C             | 0.2399 |
| 4:187213360      | rs72712610  | A             | 0.1509 |
| 4:187219599      | rs56379917  | A             | 0.1638 |
| 4:187220894      | rs13126546  | T             | 0.1142 |
| 4:187234735      | rs72712626  | G             | 0.1365 |
| 4:187240280      | rs13137269  | T             | 0.0617 |
| 4:187267791      | rs75440104  | C             | 0.1177 |
| 4:187347217      | rs7685922   | C             | 0.054  |
| 4:79917638       | rs140303646 | T             | 0.218  |
| 5:143119511      | rs325247    | C             | 0.0439 |
| 5:172785895      | rs12234072  | G             | 0.0661 |
| 5:32831939       | rs12656497  | T             | 0.0438 |
| 5:38708554       | rs16867574  | C             | 0.059  |
| 5:63916834       | rs4700642   | A             | 0.0491 |
| 5:75992254       | rs56347914  | C             | 0.0843 |
| 6:147701133      | rs9373523   | G             | 0.06   |
| 6:169633335      | rs11759438  | C             | 0.0436 |
| 6:25531133       | rs214057    | C             | 0.0446 |
| 6:28436060       | rs2531815   | T             | 0.047  |
| 6:29894392       | rs1627764   | G             | 0.0525 |
| 6:30639412       | rs3094094   | A             | 0.0793 |
| 6:31092767       | rs3095304   | T             | 0.0634 |
| 6:31239869       | rs2074492   | T             | 0.051  |
| 7:151028181      | rs11981586  | C             | 0.0657 |
| 7:157763424      | rs1347390   | G             | 0.0515 |
| 8:102881195      | rs118105926 | A             | 0.1379 |

| Chr:Pos (GRCh37) | Rsid        | Effect Allele | Beta   |
|------------------|-------------|---------------|--------|
| 8:106573309      | rs7341574   | T             | 0.0452 |
| 8:106590705      | rs4541868   | C             | 0.0876 |
| 8:108291878      | rs4236786   | C             | 0.0512 |
| 8:108340982      | rs7004172   | G             | 0.051  |
| 8:108347806      | rs6991048   | T             | 0.0904 |
| 8:27810577       | rs2685413   | G             | 0.0608 |
| 8:27820792       | rs10087301  | A             | 0.0632 |
| 8:30265541       | rs117564659 | G             | 0.1314 |
| 8:53204323       | rs138757339 | C             | 0.2102 |
| 8:78572803       | rs17383689  | G             | 0.0833 |
| 8:87143573       | rs7812868   | C             | 0.0621 |
| 9:116253293      | rs189064188 | T             | 0.0804 |
| 9:124362398      | rs146383320 | T             | 0.1278 |
| 9:135985796      | rs3761824   | C             | 0.0538 |
| 9:136025460      | rs3888561   | C             | 0.0559 |
| 9:136031918      | rs7027827   | A             | 0.0729 |
| 9:136056956      | rs10793953  | G             | 0.0496 |
| 9:136062437      | rs10441806  | C             | 0.105  |
| 9:136069931      | rs7039497   | G             | 0.1081 |
| 9:136077004      | rs11244032  | C             | 0.0837 |
| 9:136080512      | rs149189328 | C             | 0.2669 |
| 9:136081319      | rs11244035  | T             | 0.2223 |
| 9:136098498      | rs28470788  | T             | 0.0723 |
| 9:136121303      | rs7855466   | T             | 0.1054 |
| 9:136124590      | rs78755596  | A             | 0.2855 |
| 9:136128731      | rs11244051  | A             | 0.384  |
| 9:136144593      | rs66697526  | G             | 0.1399 |
| 9:136145404      | rs9411377   | A             | 0.308  |
| 9:136152070      | rs8176634   | G             | 0.1117 |
| 9:136152722      | rs8176630   | C             | 0.1382 |
| 9:136156064      | rs55988407  | G             | 0.1664 |
| 9:136156230      | rs78590974  | T             | 0.2221 |
| 9:136157037      | rs557317    | A             | 0.1499 |
| 9:136177993      | rs4962043   | G             | 0.0607 |
| 9:136184782      | rs9411395   | G             | 0.1408 |
| 9:136184985      | rs11791119  | T             | 0.1052 |
| 9:136185324      | rs11789139  | G             | 0.1669 |
| 9:136193356      | rs76771223  | G             | 0.1431 |
| 9:136212168      | rs117119759 | A             | 0.2099 |
| 9:136226421      | rs141397052 | G             | 0.2259 |
| 9:136240304      | rs3124755   | C             | 0.1278 |
| 9:136255149      | rs62575992  | C             | 0.0967 |

| Chr:Pos (GRCh37) | Rsid        | Effect Allele | Beta   |
|------------------|-------------|---------------|--------|
| 9:136268084      | rs3124747   | A             | 0.0757 |
| 9:136270538      | rs41302673  | G             | 0.242  |
| 9:136277854      | rs2285488   | G             | 0.1007 |
| 9:136296530      | rs149181677 | T             | 0.2461 |
| 9:136311017      | rs652600    | A             | 0.0992 |
| 9:136323826      | rs3094373   | A             | 0.2432 |
| 9:136343647      | rs3094326   | G             | 0.1027 |
| 9:136359182      | rs736418    | G             | 0.0556 |
| 9:136365146      | rs28615587  | T             | 0.078  |
| 9:136382716      | rs9802874   | A             | 0.0636 |
| 9:136390015      | rs13300181  | A             | 0.0616 |
| 9:136397195      | rs11507716  | T             | 0.0802 |
| 9:136509514      | rs1611128   | G             | 0.0495 |
| 10:121010256     | rs10886430  | G             | 0.1289 |
| 10:32397591      | rs211416    | T             | 0.0684 |
| 10:45632668      | rs2211163   | A             | 0.0724 |
| 10:71144324      | rs2305196   | A             | 0.0555 |
| 10:71148728      | rs12416320  | G             | 0.1553 |
| 10:71153882      | rs3793846   | T             | 0.0572 |
| 10:71181371      | rs36054387  | C             | 0.0729 |
| 10:71215107      | rs137936874 | G             | 0.2231 |
| 10:71218059      | rs10998791  | A             | 0.0677 |
| 10:71245276      | rs78707713  | T             | 0.2414 |
| 10:71262048      | rs1665581   | G             | 0.0771 |
| 10:71333897      | rs12785008  | C             | 0.0691 |
| 10:71346272      | rs12783163  | A             | 0.0596 |
| 10:76189250      | rs140438685 | A             | 0.2024 |
| 10:80898969      | rs1769758   | G             | 0.0436 |
| 10:96011865      | rs1547643   | G             | 0.0476 |
| 11:126300537     | rs11600151  | T             | 0.0793 |
| 11:32967270      | rs563259534 | T             | 0.1048 |
| 11:33247621      | rs2061997   | T             | 0.049  |
| 11:46559730      | rs11038913  | T             | 0.1126 |
| 11:46745003      | rs5896      | T             | 0.0668 |
| 11:46893108      | rs2306029   | T             | 0.0641 |
| 11:46896126      | rs72897640  | T             | 0.0672 |
| 11:47373425      | rs2856656   | C             | 0.3976 |
| 11:47794348      | rs34953939  | A             | 0.0931 |
| 11:48865680      | rs369876615 | C             | 0.1184 |
| 11:50242788      | rs117653193 | T             | 0.1049 |
| 11:51282525      | rs11606922  | C             | 0.1115 |
| 11:55436134      | rs72910502  | C             | 0.1161 |

| Chr:Pos (GRCh37) | Rsid        | Effect Allele | Beta   |
|------------------|-------------|---------------|--------|
| 11:56526894      | rs543926510 | C             | 0.1339 |
| 11:56735815      | rs75348906  | A             | 0.0695 |
| 11:56875074      | rs141798115 | T             | 0.2207 |
| 11:61489705      | rs198428    | A             | 0.0464 |
| 11:61571348      | rs174548    | C             | 0.0842 |
| 11:61621611      | rs73487492  | A             | 0.1034 |
| 11:73283937      | rs12274057  | T             | 0.0751 |
| 12:104147207     | rs3751198   | G             | 0.0491 |
| 12:111932800     | rs7137828   | C             | 0.0424 |
| 12:123861452     | rs28413626  | G             | 0.0739 |
| 12:32844798      | rs61926202  | A             | 0.2109 |
| 12:39156743      | rs137870902 | T             | 0.2329 |
| 12:54734289      | rs11170877  | A             | 0.0696 |
| 12:6071943       | rs139727584 | C             | 0.1076 |
| 12:6150824       | rs183356    | A             | 0.1405 |
| 12:6160614       | rs7135039   | T             | 0.0781 |
| 12:6170645       | rs78915411  | G             | 0.0823 |
| 13:113787459     | rs3211752   | G             | 0.06   |
| 13:113808274     | rs12858483  | G             | 0.0588 |
| 14:100108918     | rs12886724  | G             | 0.0501 |
| 14:26690604      | rs77398404  | T             | 0.0794 |
| 14:66082793      | rs2229678   | C             | 0.1842 |
| 14:83281618      | rs112089121 | G             | 0.0752 |
| 14:92217670      | rs61988257  | A             | 0.0603 |
| 14:94838142      | rs112635299 | T             | 0.1463 |
| 15:43757184      | rs190543502 | T             | 0.1973 |
| 15:43911751      | rs115384559 | T             | 0.3853 |
| 15:44880783      | rs148770227 | C             | 0.1837 |
| 15:65114833      | rs35204896  | G             | 0.0738 |
| 15:66430422      | rs74245462  | T             | 0.0503 |
| 15:96125226      | rs17502085  | A             | 0.0525 |
| 16:1405044       | rs116468525 | A             | 0.2059 |
| 16:81840709      | rs34603417  | A             | 0.0456 |
| 16:81844607      | rs9937779   | C             | 0.0568 |
| 16:81870969      | rs12445050  | T             | 0.1248 |
| 16:81874200      | rs61374069  | A             | 0.0524 |
| 16:81896523      | rs55909816  | C             | 0.0437 |
| 16:81902990      | rs4889419   | G             | 0.0575 |
| 16:81915832      | rs11150422  | G             | 0.053  |
| 16:81971403      | rs1071644   | C             | 0.0475 |
| 16:81976177      | rs16956040  | C             | 0.0613 |
| 16:89265466      | rs12926888  | A             | 0.0449 |

| Chr:Pos (GRCh37) | Rsid        | Effect Allele | Beta   |
|------------------|-------------|---------------|--------|
| 17:1966457       | rs1048483   | T             | 0.0616 |
| 17:2172753       | rs216181    | A             | 0.072  |
| 17:43758898      | rs57222984  | G             | 0.0522 |
| 17:67081278      | rs77542162  | G             | 0.1932 |
| 17:7785590       | rs78209469  | T             | 0.0867 |
| 17:8393900       | rs2270744   | C             | 0.0447 |
| 18:74465347      | rs62112094  | A             | 0.059  |
| 18:75283432      | rs2032276   | G             | 0.0435 |
| 18:8800723       | rs631126    | C             | 0.0579 |
| 19:10639312      | rs8100818   | T             | 0.0483 |
| 19:10659971      | rs11668544  | G             | 0.1314 |
| 19:10688153      | rs187758170 | A             | 0.1465 |
| 19:10734951      | rs8110479   | C             | 0.1131 |
| 19:10741622      | rs12710257  | G             | 0.1164 |
| 19:10898413      | rs8107372   | T             | 0.0515 |
| 19:17004049      | rs1054533   | T             | 0.0451 |
| 19:33896432      | rs4805881   | C             | 0.0544 |
| 19:3464793       | rs142170418 | C             | 0.1574 |
| 19:45426792      | rs141622900 | A             | 0.1007 |
| 19:46268902      | rs2341097   | T             | 0.0502 |
| 19:49241006      | rs12981072  | C             | 0.0469 |
| 19:55536595      | rs1613662   | A             | 0.0818 |
| 19:7832001       | rs874492    | A             | 0.0481 |
| 20:22672552      | rs6137727   | A             | 0.0534 |
| 20:22938940      | rs62204096  | A             | 0.1565 |
| 20:23000653      | rs6076004   | T             | 0.0472 |
| 20:23077117      | rs149439892 | A             | 0.1527 |
| 20:23170450      | rs34397775  | A             | 0.084  |
| 20:23182559      | rs6083037   | A             | 0.0798 |
| 20:32485961      | rs6087538   | C             | 0.0585 |
| 20:32523172      | rs6059574   | G             | 0.0479 |
| 20:33434252      | rs56244533  | A             | 0.0567 |
| 20:33435161      | rs17092148  | G             | 0.0612 |
| 20:33451060      | rs75627267  | T             | 0.1209 |
| 20:33587569      | rs551986443 | C             | 0.1488 |
| 20:33612647      | rs564783003 | C             | 0.1488 |
| 20:33733180      | rs2050652   | G             | 0.0564 |
| 20:33762035      | rs2069946   | C             | 0.1255 |
| 20:33772243      | rs6060288   | A             | 0.1178 |
| 20:33858772      | rs6058218   | G             | 0.0552 |
| 20:33895947      | rs6058227   | T             | 0.0813 |
| 20:34025983      | rs143383    | G             | 0.0482 |

| <b>Chr:Pos (GRCh37)</b> | <b>Rsid</b> | <b>Effect Allele</b> | <b>Beta</b> |
|-------------------------|-------------|----------------------|-------------|
| 20:34562935             | rs185663249 | A                    | 0.1487      |
| 20:34712310             | rs6141600   | C                    | 0.0482      |
| 22:42461918             | rs2854827   | G                    | 0.0589      |
| 22:43107837             | rs9620086   | G                    | 0.0609      |
| 22:44324730             | rs738408    | C                    | 0.0566      |
| 1:169519049             | rs6025      | T                    | 0.4031      |
| 11:46761055             | rs1799963   | A                    | 0.2741      |

**sTable 2: Summary statistics for candidate SNPs used for constructing sensitive polygenic risk score (Secondary PRS\_VTE).**

| <b>SNPs (GRCh37)</b> | <b>Risk Allele</b> | <b>Allelic OR</b> |
|----------------------|--------------------|-------------------|
| rs6025               | T                  | 3.25              |
| rs4524               | T                  | 1.20              |
| rs2066865            | A                  | 1.24              |
| rs4253417            | C                  | 1.27              |
| rs529565             | C                  | 1.55              |
| rs1799963            | A                  | 2.29              |
| rs6087685            | C                  | 1.15              |
| rs4602861            | A                  | 1.20              |
| rs78707713           | T                  | 1.28              |
| rs2288904            | G                  | 1.19              |

**sTable 3: ICD-10 codes for the identification of venous thromboembolism.**

|        |                                                                           |
|--------|---------------------------------------------------------------------------|
|        |                                                                           |
| "I26"  | Pulmonary embolism                                                        |
| "I260" | Pulmonary embolism with mention of acute cor pulmonale                    |
| "I269" | Pulmonary embolism without mention of acute cor pulmonale                 |
| "I801" | Phlebitis and thrombophlebitis of femoral vein                            |
| "I802" | Phlebitis and thrombophlebitis of other deep vessels of lower extremities |
| "I803" | Phlebitis and thrombophlebitis of lower extremities, unspecified          |
| "I81"  | Portal vein thrombosis                                                    |
| "I82"  | Other venous embolism and thrombosis                                      |
| "I820" | Budd-Chiari syndrome                                                      |
| "I822" | Embolism and thrombosis of vena cava                                      |
| "I823" | Embolism and thrombosis of renal vein                                     |
| "I828" | Embolism and thrombosis of other specified veins                          |
| "I829" | Embolism and thrombosis of unspecified vein                               |



sTable 4: Association between the polygenic risk score and the negative control outcome.

|                             | Number of people | Number of cases | Incidence rate (95% CI)* | Adjusted hazard ratio (95% CI) <sup>§</sup> |
|-----------------------------|------------------|-----------------|--------------------------|---------------------------------------------|
| <b>Diabetes</b>             |                  |                 |                          |                                             |
| Whole UKBB (Pre-pandemic)   | 373,207          | 2522            | 1.85 (1.78 to 1.93)      | 1.02 (0.98 to 1.06)                         |
| Whole UKBB (Early-pandemic) | 368,112          | 1278            | 1.26 (1.20 to 1.34)      | 0.98 (0.93 to 1.04)                         |

## 1. References

- 1 Heit JA. Epidemiology of venous thromboembolism. *Nat Rev Cardiol*. 2015;12(8):464-474. doi:10.1038/nrcardio.2015.83.
- 2 Khan F, Tritschler T, Kahn SR, Rodger MA. Venous thromboembolism. *The Lancet*. 2021;398(10294):64-77. doi:10.1016/S0140-6736(20)32658-1.
- 3 White RH. The epidemiology of venous thromboembolism. *Circulation*. 2003;107(23 Suppl 1):I4-8. doi:10.1161/01.CIR.0000078468.11849.66.
- 4 Hippisley-Cox J, Patone M, Mei XW, et al. Risk of thrombocytopenia and thromboembolism after covid-19 vaccination and SARS-CoV-2 positive testing: self-controlled case series study. *BMJ*. 2021;374:n1931. doi:10.1136/bmj.n1931.
- 5 Ribeiro DD, Lijfering WM, van Hylckama Vlieg A, Rosendaal FR, Cannegieter SC. Pneumonia and risk of venous thrombosis: results from the MEGA study. *Journal of Thrombosis and Haemostasis*. 2012;10(6):1179-1182. doi:10.1111/j.1538-7836.2012.04732.x.
- 6 Martinelli I, Stefano V de, Mannucci PM. Inherited risk factors for venous thromboembolism. *Nat Rev Cardiol*. 2014;11(3):140-156. doi:10.1038/nrcardio.2013.211.
- 7 Bycroft C, Freeman C, Petkova D, et al. The UK Biobank resource with deep phenotyping and genomic data. *Nature*. 2018;562(7726):203-209. doi:10.1038/s41586-018-0579-z.
- 8 data.bris. UK Biobank Genetic Data: MRC-IEU Quality Control, version 2 - data.bris. <https://data.bris.ac.uk/data/dataset/1ovaau5sxunp2cv8rcy88688v>. Updated January 27, 2022. Accessed January 27, 2022.
- 9 Klarin D, Busenkell E, Judy R, et al. Genome-wide association analysis of venous thromboembolism identifies new risk loci and genetic overlap with arterial vascular disease. *Nat Genet*. 2019;51(11):1574-1579. doi:10.1038/s41588-019-0519-3.
- 10 Germain M, Chasman DI, Haan H de, et al. Meta-analysis of 65,734 individuals identifies TSPAN15 and SLC44A2 as two susceptibility loci for venous thromboembolism. *American journal of human genetics*. 2015;96(4):532-542. doi:10.1016/j.ajhg.2015.01.019.
- 11 GOV.UK. Joint Committee on Vaccination and Immunisation: advice on priority groups for COVID-19 vaccination, 30 December 2020. <https://www.gov.uk/government/publications/priority-groups-for-coronavirus-covid-19-vaccination-advice-from-the-jcvi-30-december-2020/joint-committee-on-vaccination-and-immunisation-advice-on-priority-groups-for-covid-19-vaccination-30-december-2020>. Updated April 11, 2022. Accessed April 11, 2022.
- 12 GOV.UK. UK COVID-19 vaccines delivery plan. <https://www.gov.uk/government/publications/uk-covid-19-vaccines-delivery-plan/uk-covid-19-vaccines-delivery-plan>. Updated March 13, 2022. Accessed March 13, 2022.
- 13 Marston NA, Melloni GEM, Gurmu Y, et al. Genetic Risk Score to Identify Risk of Venous Thromboembolism in Patients With Cardiometabolic Disease. *Circ Genom Precis Med*. 2020;14(1):e003006. doi:10.1161/CIRCGEN.120.003006.
- 14 Ridker PM. Ethnic Distribution of Factor V Leiden in 4047 Men and Women. *JAMA*. 1997;277(16):1305. doi:10.1001/jama.1997.03540400055031.
- 15 Segal JB, Brotman DJ, Necochea AJ, et al. Predictive value of factor V Leiden and prothrombin G20210A in adults with venous thromboembolism and in family members of those with a mutation: a systematic review. *JAMA*. 2009;301(23):2472-2485. doi:10.1001/jama.2009.853.
